# Supplementary material for: Modeling future hydrogen supply chains in the western United States under uncertainties: an optimization-based approach focusing on California as a hydrogen hub
Source: Royal Society of Chemistry journal article supplement (doi:10.1039/d3se00043e), 2023-01-01
Supplement: d3se00043e1.pdf [file d3se00043e1.pdf]

## Supplemental Material 1.0

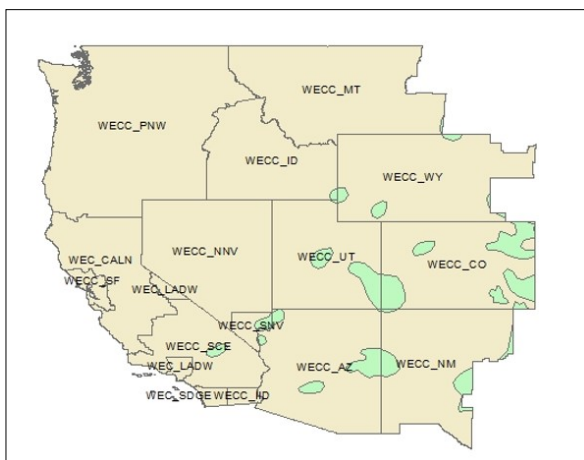

Figure S1: Western states with possible salt domes/deposits

Table S1: Delivery pathways available in SERA

| Pathway                         | Stage | Technology                                       |
|---------------------------------|-------|--------------------------------------------------|
| Liquid hydrogen (LH2) truck     | 1     | LH2 truck terminal with liquefaction and storage |
|                                 | 2     | LH2 truck                                        |
|                                 | 3     | End use point (city gate/refueling station)      |
| Gaseous hydrogen (GH2) pipeline | 1     | Pipeline compressor and salt cavern storage      |
|                                 | 2     | Pipeline (transmission)                          |
|                                 | 3     | End use point (city gate/refueling station)      |
| Gaseous hydrogen (GH2) truck    | 1     | GH2 truck terminal with storage                  |
|                                 | 2     | GH2 truck                                        |
|                                 | 3     | End use point (city gate/refueling station)      |

Table S2: Breakdown of hydrogen demand (other than on-road transportation) by location

| Location      | Aggregated Non-transport Demand types                               |
|---------------|---------------------------------------------------------------------|
| San Diego     | Aviation, Residential/Commercial, others                            |
| Los Angeles   | Marine, Refinery, Biofuel, Aviation, Residential/Commercial, others |
| San Jose      | Aviation, Residential/Commercial, others                            |
| San Francisco | Marine, Refinery, Biofuel, Aviation, Residential/Commercial, others |

|             |                                                             |
|-------------|-------------------------------------------------------------|
| Sacramento  | Aviation, Residential/Commercial, others                    |
| Bakersfield | Refinery, Biofuel, Aviation, Residential/Commercial, others |

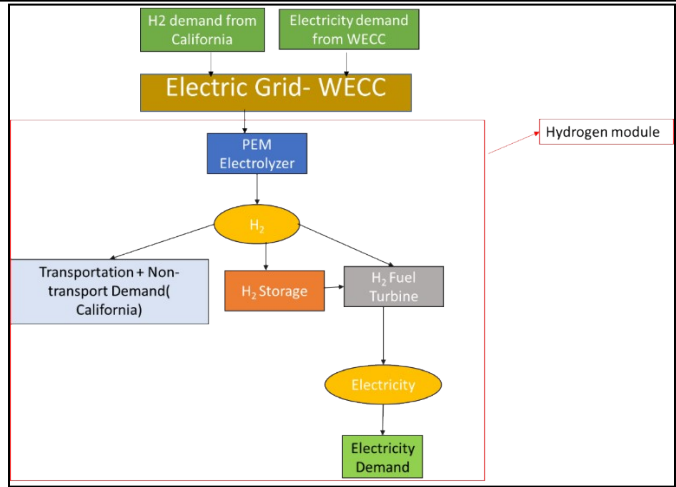

Figure S2: Hydrogen module in GOOD

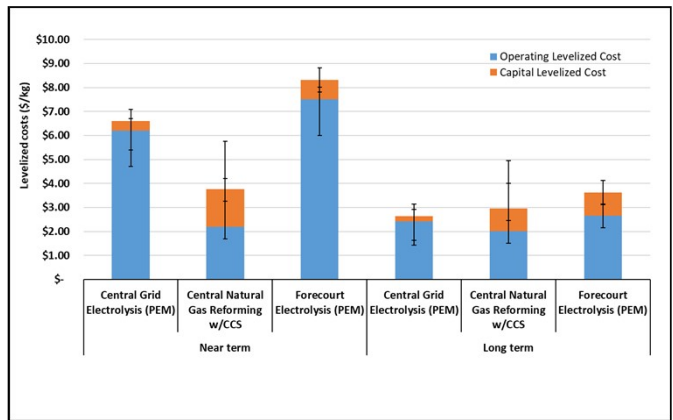

Figure S3: Levelized cost of hydrogen production

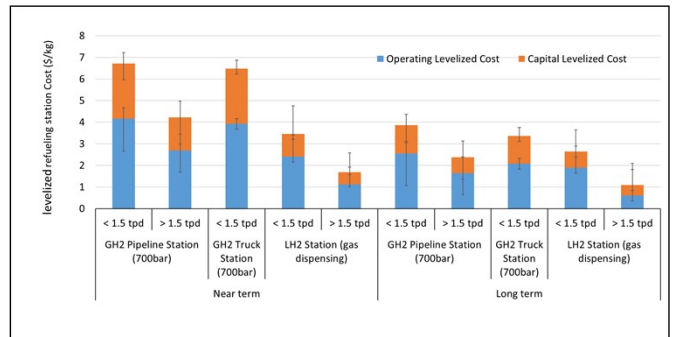

Figure S4: Levelized refueling station costs

| Capacity (tpd) | Distance (km) |         |          |         |         |         |         |         |         |         |         |         |         |          |              | Mode of Deliver |
|----------------|---------------|---------|----------|---------|---------|---------|---------|---------|---------|---------|---------|---------|---------|----------|--------------|-----------------|
|                | 5             | 10      | 30       | 50      | 100     | 150     | 200     | 300     | 400     | 500     | 700     | 1000    | 1200    | 1500     |              |                 |
| 0.5            | \$ 13.57      | \$13.59 | \$ 10.79 | \$13.63 | \$13.70 | \$13.76 | \$13.86 | \$13.96 | \$14.09 | \$14.22 | \$14.54 | \$14.87 | \$15.19 | \$ 15.52 | GH2 Pipeline |                 |
| 1              | \$ 10.76      | \$10.77 | \$ 8.51  | \$10.81 | \$10.86 | \$10.92 | \$11.00 | \$11.09 | \$11.20 | \$11.31 | \$11.59 | \$11.87 | \$12.15 | \$ 12.43 |              |                 |
| 2              | \$ 7.94       | \$ 7.96 | \$ 6.23  | \$ 7.73 | \$ 8.03 | \$ 8.08 | \$ 8.15 | \$ 8.22 | \$ 8.31 | \$ 8.41 | \$ 8.61 | \$ 8.88 | \$ 9.11 | \$ 9.35  | GH2 Truck    |                 |
| 3              | \$ 5.13       | \$ 5.14 | \$ 3.96  | \$ 4.50 | \$ 5.20 | \$ 5.24 | \$ 5.29 | \$ 5.35 | \$ 5.43 | \$ 5.50 | \$ 5.69 | \$ 5.88 | \$ 6.07 | \$ 6.27  |              |                 |
| 10             | \$ 4.89       | \$ 4.90 | \$ 3.61  | \$ 4.00 | \$ 4.97 | \$ 5.01 | \$ 5.07 | \$ 5.14 | \$ 5.22 | \$ 5.30 | \$ 5.51 | \$ 5.72 | \$ 5.76 | \$ 5.81  | LH2 Truck    |                 |
| 15             | \$ 4.65       | \$ 4.67 | \$ 3.26  | \$ 3.51 | \$ 4.35 | \$ 4.79 | \$ 4.85 | \$ 4.92 | \$ 5.02 | \$ 5.09 | \$ 5.13 | \$ 5.18 | \$ 5.22 | \$ 5.27  |              |                 |
| 20             | \$ 4.42       | \$ 4.43 | \$ 2.91  | \$ 3.02 | \$ 3.37 | \$ 3.72 | \$ 4.26 | \$ 4.50 | \$ 4.52 | \$ 4.54 | \$ 4.59 | \$ 4.64 | \$ 4.69 | \$ 4.74  |              |                 |
| 30             | \$ 4.30       | \$ 4.31 | \$ 2.85  | \$ 2.93 | \$ 3.20 | \$ 3.47 | \$ 3.88 | \$ 4.28 | \$ 4.39 | \$ 4.41 | \$ 4.46 | \$ 4.51 | \$ 4.57 | \$ 4.62  |              |                 |
| 50             | \$ 4.17       | \$ 4.17 | \$ 2.79  | \$ 2.84 | \$ 3.03 | \$ 3.22 | \$ 3.50 | \$ 3.78 | \$ 4.16 | \$ 4.28 | \$ 4.33 | \$ 4.39 | \$ 4.45 | \$ 4.50  |              |                 |
| 75             | \$ 4.55       | \$ 4.55 | \$ 2.77  | \$ 2.81 | \$ 2.98 | \$ 3.14 | \$ 3.38 | \$ 3.62 | \$ 3.95 | \$ 4.27 | \$ 4.74 | \$ 4.81 | \$ 4.88 | \$ 4.94  |              |                 |
| 100            | \$ 4.93       | \$ 4.94 | \$ 2.75  | \$ 2.79 | \$ 2.92 | \$ 3.06 | \$ 3.26 | \$ 3.46 | \$ 3.74 | \$ 4.01 | \$ 4.68 | \$ 5.23 | \$ 5.31 | \$ 5.38  |              |                 |
| 150            | \$ 4.20       | \$ 4.21 | \$ 2.72  | \$ 2.75 | \$ 2.85 | \$ 2.95 | \$ 3.11 | \$ 3.28 | \$ 3.46 | \$ 3.67 | \$ 4.17 | \$ 4.45 | \$ 4.51 | \$ 4.58  |              |                 |
| 200            | \$ 3.47       | \$ 3.48 | \$ 2.69  | \$ 2.71 | \$ 2.78 | \$ 2.85 | \$ 2.95 | \$ 3.05 | \$ 3.19 | \$ 3.32 | \$ 3.62 | \$ 3.67 | \$ 3.72 | \$ 3.77  |              |                 |
| 300            | \$ 3.82       | \$ 3.82 | \$ 2.69  | \$ 2.71 | \$ 2.77 | \$ 2.83 | \$ 2.92 | \$ 3.01 | \$ 3.13 | \$ 3.25 | \$ 3.55 | \$ 3.85 | \$ 4.10 | \$ 4.16  |              |                 |
| 400            | \$ 4.16       | \$ 4.17 | \$ 2.68  | \$ 2.70 | \$ 2.75 | \$ 2.80 | \$ 2.88 | \$ 2.96 | \$ 3.07 | \$ 3.17 | \$ 3.44 | \$ 3.70 | \$ 3.97 | \$ 4.23  |              |                 |

Figure S5: Least-cost delivery mode to a 1.5 metric ton per day refueling station (station costs included)

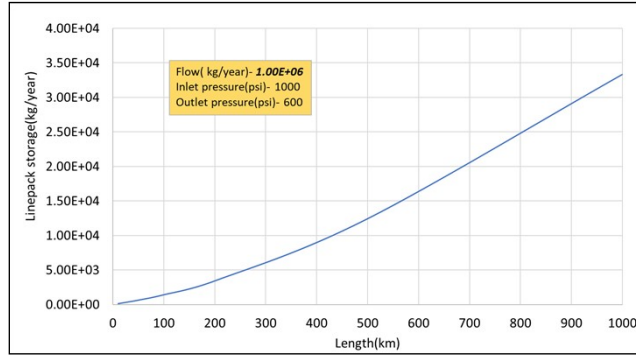

Figure S6: Storage limits for line-packed hydrogen pipelines

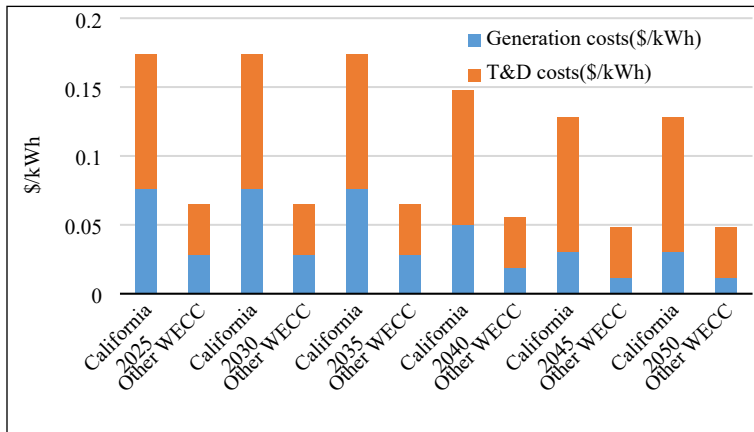

Figure S7: Breakdown of industrial electricity prices (\$/kWh)

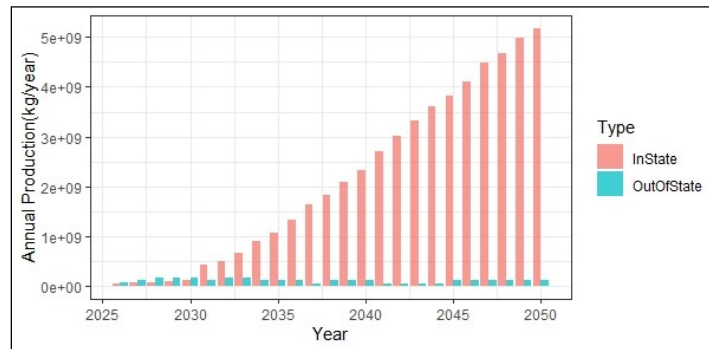

Figure S8: Distribution of in state and out-of-state production/regional imports for scenario POL\_0perc\_hub

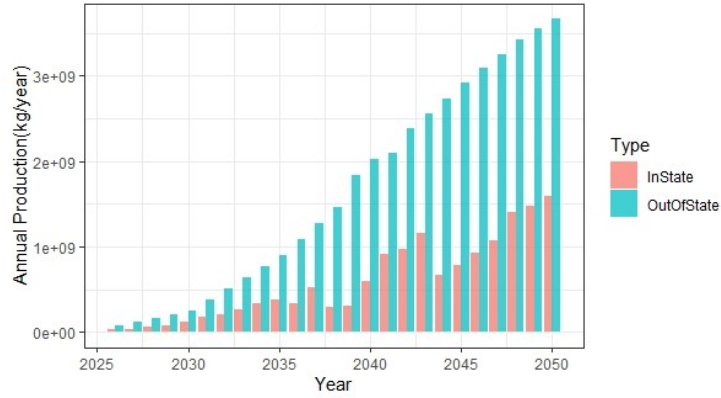

Figure S9: Distribution of in-state and out-of-state production/regional imports for scenario POL\_75perc\_hub

## 1. Nomenclature

### 1.1. Sets

N: the set of all nodes

T: the set of all intra-year time periods

Y: the set of all years

PT: the set of all production technologies

PW: the set of all pathways

L: the set of all links

$L_n$ : the set of all links connected to node n

$PT_{clean}$ : the set of clean H<sub>2</sub> production technologies

$S_{pw}$ : the set of all stages in pathway pw

$S_{pw}^{unext}$ : the set of all un-extended stages in pathway pw

$S_{pw}^{ext}$ : the set of all extended stages in pathway pw

### 1.2. Decision Variables

All decision variables are non-negative, unless stated otherwise.

#### 1.2.1. Planning Variables

$K_{n,y}^{pt,new}$ : New capacity of production technology pt added at node n in year y

$K_{n,y}^{s,pw,new}$ : New capacity of unextended stage s of pathway pw added at node n in year y

$K_{l,y}^{s,pw,new}$ : New capacity of extended stage s of pathway pw added at link l in year y

$K_{n,y}^{stor,s,pw,new}$ : New capacity of storage at unextended stage s of pathway pw added at node n in year y

### 1.2.2. Operations Variables

$p_{n,t,y}^{pt}$ : Total hydrogen produced by production technology pt at node n in time-period t in year y

$f_{n,t,y}^{s,pw}$ : Total hydrogen flowing through stage s of pathway pw at node n in time – period t in year y

$f_{n,t,y}^{stor\ in,s,pw}$ : Total hydrogen flowing into storage at stage s of pathway pw at node n in time – period t in year y

$f_{n,t,y}^{stor\ out,s,pw}$ : Total hydrogen flowing out of storage at stage s of pathway pw at node n in time – period t in year y

$x_{n,t,y}^{stor,s,pw}$ : Total hydrogen stored at at stage s of pathway pw at node n in time – period t in year y

$f_{l,n \rightarrow n_l,t,y}^{s,pw}$ : Total hydrogen flowing from node n across link l at stage s of pathway pw in time – period t in year y

$f_{l,n_l \rightarrow n,t,y}^{s,pw}$ : Total hydrogen flowing into node n across link l at stage s of pathway pw in time – period t in year y

$f_{l,n \rightarrow n_l,t,y}^{stor\ in,s,pw}$ : Total hydrogen flowing into storage in extended stage s of pathway pw across link l in time-period t in year y

$f_{l,n \rightarrow n_l,t,y}^{stor\ out,s,pw}$ : Total hydrogen flowing out of storage in extended stage s of pathway pw across link l in time-period t in year y

$x_{l,n \rightarrow n_l,t,y}^{stor,s,pw}$ : Total hydrogen stored in extended stage s of pathway pw across link l in time-period t in year y

### 1.3. Parameters

$IC^{stor,s,pw}$ : Investment cost of storage at un-extended stage s of pathway pw (\$/kg)

$FC^{pt}$ : Annual fixed cost of production technology pt (\$/kg)

$FC^{s,pw}$ : Annual fixed cost of un-extended stage s of pathway pw (\$/kg)

$FC^{stor,s,pw}$ : Annual fixed cost of storage at un-extended stage s of pathway pw (\$/kg)

$FC^{l,s,pw}$ : Annual fixed cost of extended stage s of pathway pw across link l (\$/kg)

$IC^{pt}$ : Investment cost of production technology pt(\$/kg)

$IC^{s,pw}$ : Investment cost of stage s of pathway pw (\$/kg)

$IC^{l,s,pw}$ : Investment cost of extended stage s of pathway pw across link l(\$/kg)

$OC^{pt}$ : Operating cost of hydrogen production technology pt (\$/kg)

$OC^{f,s,pw}$ : Operating cost of hydrogen owing through unextended stage s of pathway pw (\$/kg)

$OC^{stor_{in},s,pw}$ : Operating cost of hydrogen sent to storage at unextended stage s of pathway pw (\$/kg)

$OC^{stor_{out},s,pw}$ : Operating cost of hydrogen withdrawn from storage at unextended stage s of pathway pw (\$/kg)

$OC^{l,s,pw}$ : Operating cost of hydrogen owing across link l through extended stage s of pathway pw (\$/kg)

$D_{n,t,y}$ : Total hydrogen demand at node n in time-period t in year y (kg)

$Y^{s,pw}$ : Hydrogen yield across stage s of pathway pw

$K_{n,y}^{pt,grid_{req}}$ : Production capacity requirement determined by the grid model for production technology pt, at node n, in year t.

$K_y^{stor,grid_{req}}$ : Total system wide H<sub>2</sub> storage capacity requirement determined by the grid model for year t.

$\alpha_y^{clean}$ : Fraction of total H<sub>2</sub> demand in year y to be satisfied by clean production technologies.

$K_{max}^{pt}$ : Maximum annual capacity addition limit for production technology pt

$K_{max}^{s,pw}$ : Maximum annual capacity addition limit for stage s of pathway pw

$K_{max}^{stors,pw}$ : Maximum annual storage capacity addition limit for un-extended stage s of pathway

pw

$\beta_{min}^{pt}$ : Minimum utilization factor for production technology pt

$\beta_{min}^{s,pw}$ : Minimum utilization factor for stage s of pathway pw

r: Discount Rate

## 2. Formulation

### 2.1. Objective function

Minimize the total investment and operating costs of producing and storing hydrogen and transporting it across the pathways to demand nodes. This is a NPV based cost minimization.

$$\text{Min} \sum_{y \in Y} \left( \frac{1}{1+r} \right)^y (I + F + O) \quad (1)$$

where,

I

$$= \sum_{n \in N} \left( \sum_{pt \in PT} IC^{pt} K_{n,y}^{pt,new} + \sum_{pw \in PW} \sum_{s \in S_{unext}^{pw}} (IC^{s,pw} K_{n,y}^{s,pw,new} + IC^{stor,s,pw} K_{n,y}^{stor,s,pw,new}) \right) + \dots$$

$$F = \sum_{n \in N} \left( \sum_{pt \in PT} FC^{pt} K_{n,y}^{pt} + \sum_{pw \in PW} \sum_{s \in S_{pw}^{unext}} (FC^{s,pw} K_{n,y}^{s,pw} + FC^{stor,s,pw} K_{n,y}^{stor,s,pw}) \right) + \sum_{l \in L} \sum_{pw \in PW} \sum_{s \in S_{pw}^{ext}} FC^{l,s,pw} K_{l,y}^{s,pw}$$

$$= \sum_{n \in N} \sum_{t \in T} \left( \sum_{pt \in PT} OC_{n,y,t}^{pt} p_{n,y,t}^{pt} + \sum_{pw \in PW} \left( \sum_{s \in S_{pw}^{unext}} (OC_{n,y,t}^{s,pw} f_{n,y,t}^{s,pw} + OC_{n,y,t}^{stor,in,pw} f_{n,y,t}^{stor,in,pw} + OC_{n,y,t}^{stor,out,pw} f_{n,y,t}^{stor,out,pw}) \right) \right)$$

## 2.2. Constraints

- Sum of H2 flowing through the first stage of all pathways at node n should be equal to the total H2 production at node n:

$$\sum_{pw \in PW} f_{n,t,y}^{1,pw} = \sum_{pw \in PW} p_{n,t,y}^{pt}, \quad \forall n, \forall t, \forall y \quad (2)$$

- Hydrogen balance at un-extended stages which are not the last stage of the pathway

$$Y^{s,pw} f_{n,t,y}^{s,pw} + f_{n,t,y}^{stor,out,s,pw} - f_{n,t,y}^{stor,in,s,pw} = f_{n,t,y}^{s+1,pw}, \quad \forall pw, \forall s \in S_{pw}^{unext} \mid s \neq last, \forall n, \forall t, \forall y \quad (3)$$

- Hydrogen storage evolution at un-extended stages:

$$x_{n,t,y}^{stor,s,pw} = x_{n,t-1,y}^{stor,s,pw} + f_{n,t,y}^{stor,in,s,pw} - f_{n,t,y}^{stor,out,s,pw}, \quad \forall pw, \forall s \in S_{pw}^{unext}, \forall n, \forall t, \forall y \quad (4)$$

- Hydrogen balance at extended stages:

$$f_{n,t,y}^{s,pw} + \sum_{l \in L_n} \left( Y^{s,pw} f_{l,n \rightarrow n_l,t,y}^{s,pw} - f_{l,n \rightarrow n_l,t,y}^{s,pw} + f_{l,n_l \rightarrow n,t,y}^{stor,out,s,pw} - f_{l,n_l \rightarrow n,t,y}^{stor,in,s,pw} \right) = f_{n,t,y}^{s,pw}, \quad \forall pw, \forall s \in S_{pw}^{ext}, \forall n, \forall t, \forall y \quad (5)$$

- Hydrogen storage evolution at extended stages:

$$x_{l,n \rightarrow n_l,t,y}^{stor,s,pw} = x_{l,n \rightarrow n_l,t-1,y}^{stor,s,pw} + f_{l,n \rightarrow n_l,t,y}^{stor,in,s,pw} - f_{l,n \rightarrow n_l,t,y}^{stor,out,s,pw}, \quad \forall l, \forall pw, \forall s \in S_{pw}^{ext}, \forall n, \forall t, \forall y \quad (6)$$

- Sum of net hydrogen flowing through the last stage of all pathways at node n should be equal to the total H2 demand at node n:

$$D_{n,t,y} = \sum_{pw \in PW} \left( Y^{last,pw} f_{n,t,y}^{last,pw} + f_{n,t,y}^{stor,out,last,pw} - f_{n,t,y}^{stor,in,last,pw} \right), \quad \forall n, \forall t, \forall y \quad (7)$$

- Hydrogen production capacity limits:

$$p_{n,t,y}^{pt} \leq K_{n,y}^{pt} \quad \forall pt, \forall n, \forall t, \forall y \quad (8)$$

- Hydrogen un-extended stage flow limits:

$$f_{n,t,y}^{s,pw} \leq K_{n,y}^{s,pw}, \quad \forall pw, \forall s \in S_{pw}^{unext}, \forall n, \forall t, \forall y \quad (9)$$

- Hydrogen un-extended stage storage limits:

$$x_{n,t,y}^{stor,s,pw} \leq K_{n,y}^{stor,s,pw}, \quad \forall pw, \forall s \in S_{pw}^{unext}, \forall n, \forall t, \forall y \quad (10)$$

- Hydrogen extended stage storage limits:

$$x_{n,t,y}^{stor,s,pw} \leq K_{n,y}^{stor,s,pw}, \quad \forall pw, \forall s \in S_{pw}^{ext}, \forall n, \forall t, \forall y \quad (11)$$

- Hydrogen extended stage flow limits

$$f_{l,n \rightarrow n',t,y}^{s,pw} \leq K_{l,y}^{s,pw} \quad \forall l, \forall pw, \forall s \in S_{pw}^{ext}, \forall n, \forall t, \forall y \quad (12)$$

- Total production capacity evolution:

$$K_{n,y}^{pt} = K_{n,y-1}^{pt} + K_{n,y}^{pt,new} \quad \forall pt, \forall n, \forall t, \forall y \quad (13)$$

- Total un-extended stage capacity evolution:

$$K_{n,y}^{s,pw} = K_{n,y-1}^{s,pw} + K_{n,y}^{s,pw,new}, \quad \forall pw, \forall s \in S_{pw}^{unext}, \forall n, \forall t, \forall y \quad (14)$$

- Total extended stage capacity evolution:

$$K_{l,y}^{s,pw} = K_{l,y-1}^{s,pw} + K_{l,y}^{s,pw,new} \quad \forall l, \forall pw, \forall s \in S_{pw}^{ext}, \forall n, \forall t, \forall y \quad (15)$$

- Total un-extended stage storage capacity evolution:

$$K_{n,y}^{stor,s,pw} = K_{n,y-1}^{stor,s,pw} + K_{n,y}^{stor,s,pw,new} \quad (16)$$

- Total extended stage storage capacity: There is a max cap on the amount of hydrogen storage possible for a given length of pipeline

$$K_{l,y}^{stor,s,pw} = f(K_{l,y}^{s,pw}) \quad (17)$$

Where f is a polynomial function of the installed extended stage capacity.

Grid connected constraints

- Nodal Production Capacity Constraint: may be turned off or on depending on the scenario

$$K_{n,y}^{pt} \geq K_{n,y}^{pt,grid,req}, \quad \forall n, \forall pt, \forall y \quad (18)$$

- System-wide Storage Capacity Constraint: may be turned off or on depending on the scenario

-



$$\sum_{n \in N} \sum_{pw \in PW} \sum_{s \in S_{pw}^{unext}} K_{n,y}^{stor,s,pw} + \sum_{l \in L} \sum_{pw \in PW} \sum_{s \in S_{pw}^{ext}} K_{l,y}^{stor,s,pw} \geq K_y^{stor,grid,req}, \forall y \quad (19)$$

Renewable hydrogen policy constraint

$$\sum_{n \in N} \sum_{pt \in PT_{clean}} \sum_{t \in T} p_{n,t,y}^{pt} \geq \alpha_y^{clean} \sum_{n \in N} \sum_{t \in T} D_{n,t,y}, \forall y \quad (20)$$

Onsite Production Constraints:

$$\sum_{pt \in PT_{onsite}} p_{n,t,y}^{pt} \leq D_{n,t,y}, \quad \forall n, \forall t, \forall y \quad (21)$$
